# Supplementary material
Source: PubMed Central journal article supplement (PMC9093561)
Supplement: NIHMS1776777-supplement-Supplementary_Data.pdf [file NIHMS1776777-supplement-Supplementary_Data.pdf]

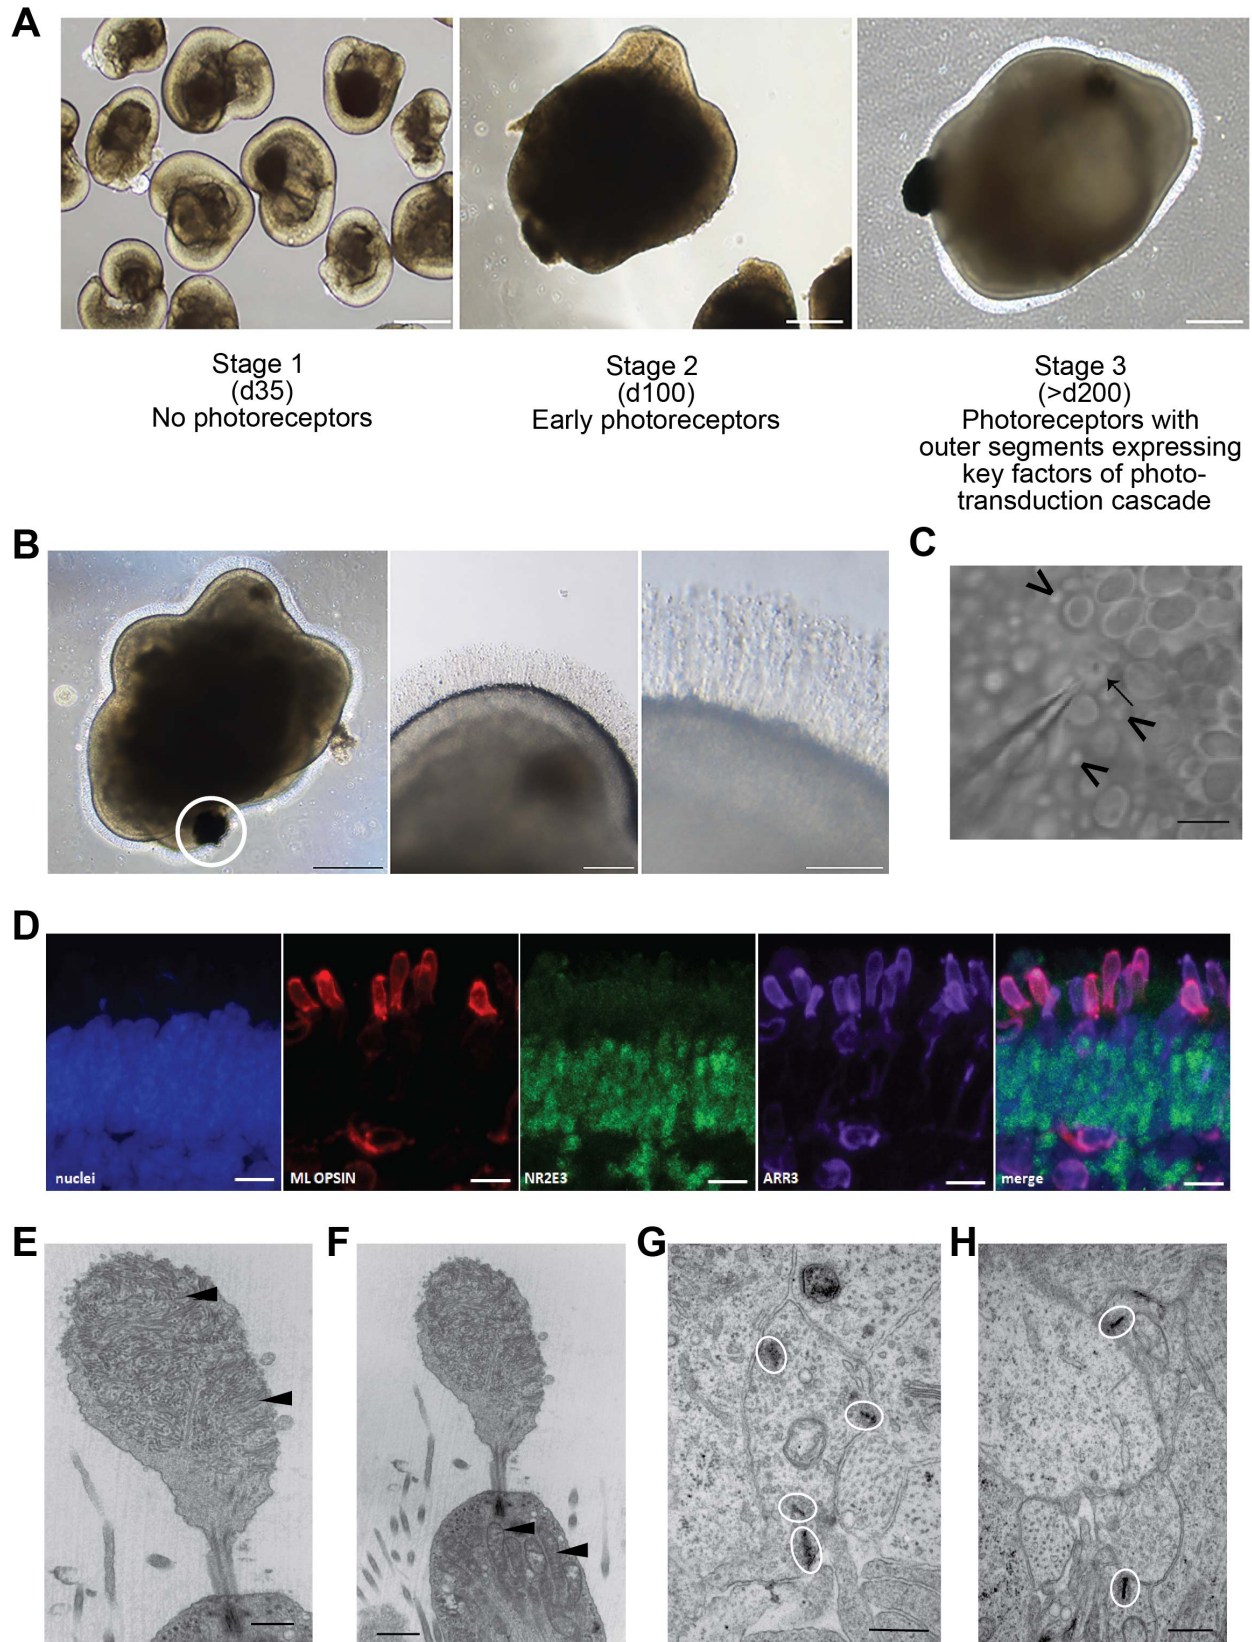

**Figure S1. Developmental timeline, photoreceptor density, morphology and ultrastructure of hPSC-retinal organoids, related to Figure 1.**

(A) Stage 1, 2 and 3 hPSC-derived ROs relative to timeline of differentiation (scale bar: 250  $\mu$ m). (B) Stage 3 RO with photoreceptor outer segments and small patch of RPE (circle; left panel). Scale bars: left - 250

$\mu\text{m}$ ; center and right –  $25 \mu\text{m}$ . (C) A cone photoreceptor in a stage 3 RO with a patch pipette attached to the inner segment. Arrow pointing to an inner segment of a cone and arrowheads pointing to the smaller inner segments of rods. Scale bar –  $6 \mu\text{m}$ . (D) Confocal image illustrating the 4:1 rod to cone ratio seen in ROs used for this study. blue, nuclei; red, cone marker; ML-Opsin, green, rod marker NR2E3; violet, cone marker ARR3; Merged. Scale bar:  $10 \mu\text{m}$ . (E) Electron micrograph of an outer segment of a stage 3 organoid showing partially stacked disks (black arrowheads) and connecting cilium. Scale bar:  $0.5 \mu\text{m}$ . (F) Lower magnification electron micrograph of the outer segment showing the attached mitochondria rich inner segment (black arrowheads) of the stage 3 organoid cone. Scale bar:  $0.8 \mu\text{m}$ . (G, H) Electron micrographs demonstrating ribbon synapses at photoreceptor terminals in a stage 3 organoid (marked by white ellipses). Scale bar:  $0.5 \mu\text{m}$ .

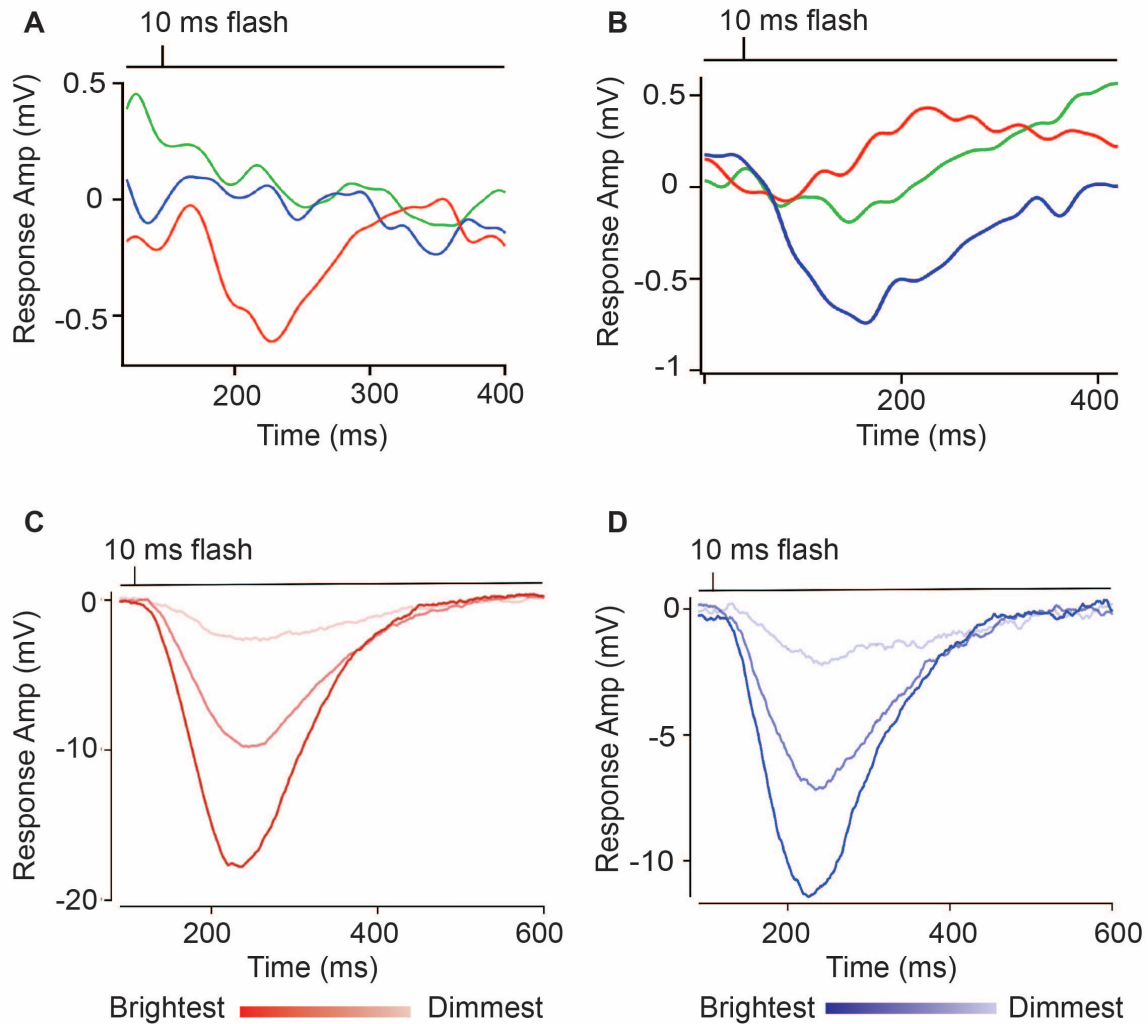

**Figure S2. Wavelength-specific light responses of organoid cones, related to Figure 1.**

(A, B) Typing flash responses (presented at time = 100ms) of a long wavelength sensitive cone (A) and a short wavelength sensitive cone (B) smoothed by using a binary smoothing function sampling over 10,000 points on Igor Pro 8.0. (C, D) Average voltage response of a long wavelength-sensitive (red; C) and a short wavelength-sensitive (blue; D) cone to increasing intensity (dimmiest – 50,000 R\*/cone/sec to brightest – 500,000 R\*/cone/sec) of a 10 ms light flash (presented at time = 100 ms).

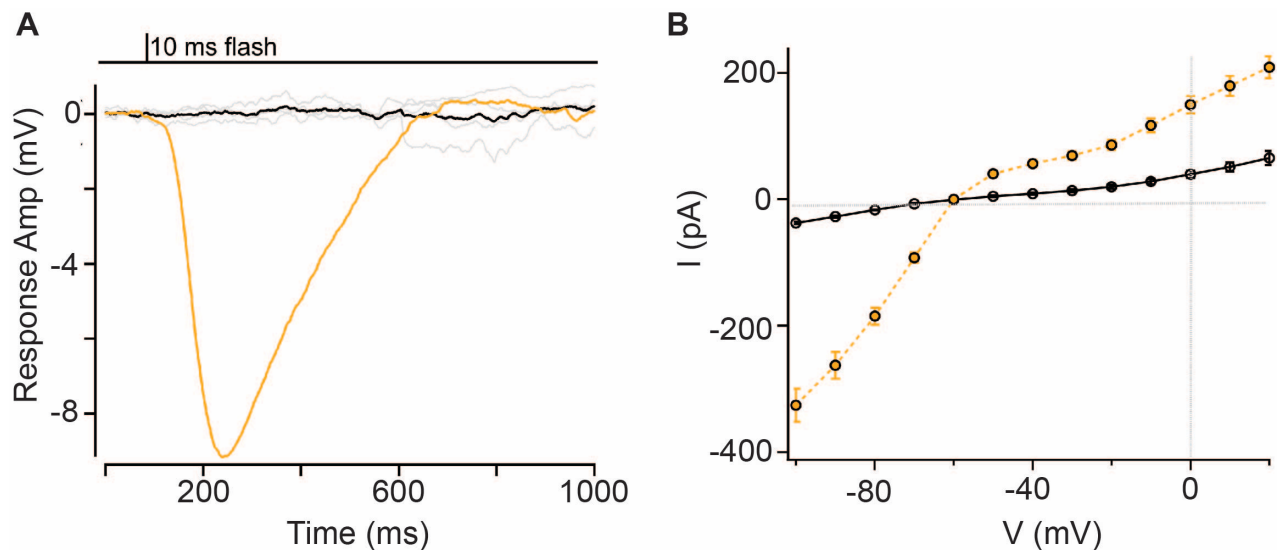

**Figure S3. Light-induced responses and current-voltage relationship of organoid rods, related to Fig 1.**

(A) Average voltage response of four stage 3 organoid rod photoreceptors (black, average response; grey, individual responses) and an organoid cone (yellow, average response) to a brief (10ms) bright flash of light. (B) Current voltage curve at plateau amplitude for RO rods (black, n=5) and cones (yellow, n=15).

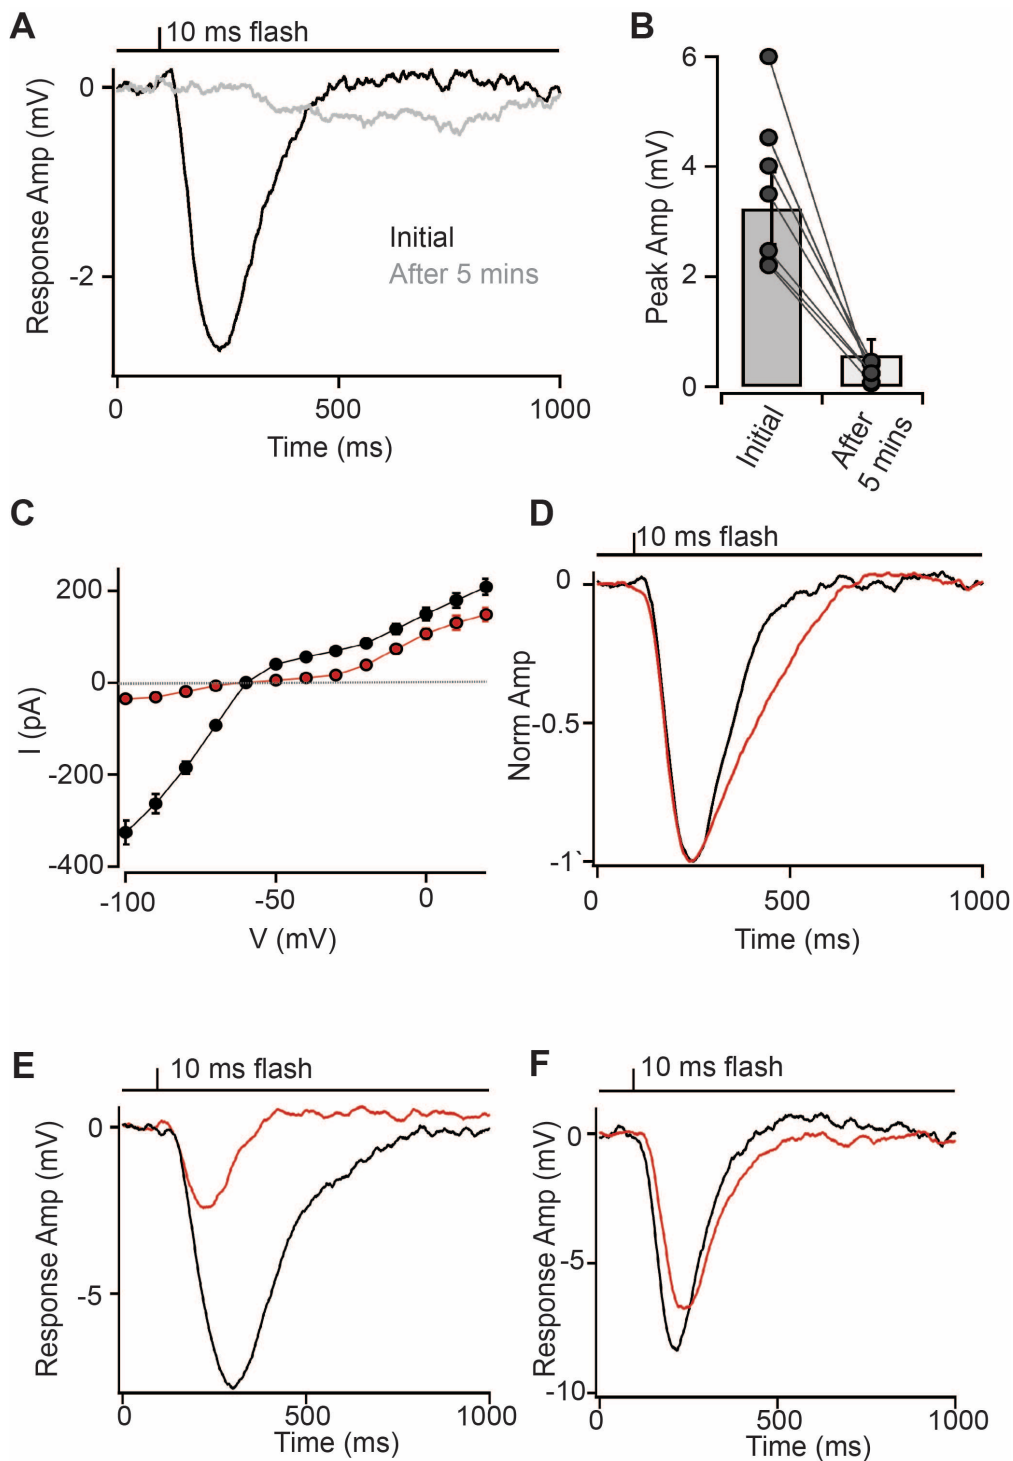

**Figure S4. Role of gap-junctional coupling and HCN channels in shaping light-evoked responses of organoid cones, related to Figures 2,3.**

(A) Voltage response of an exemplar RO cone, with an intracellular solution lacking ATP and GTP, to a 10 ms brief flash of light ( $\sim 500,000$  R\*/cone/s) soon after breaking into the cell (black trace) and 5 mins after (grey trace). (B) Response amplitude was reduced by  $\sim 90\%$  ( $n=6$ ) 5 mins after breaking into the cell. Thus, gap junctional coupling minimally contributes to RO cone responses. (C) Current-voltage curve for plateau current for RO cones before (black) and after (red) application of ZD7288, a specific HCN channel blocker.

(D) Average normalized responses (n=5) to bright light flash before (black) and after (red) application of ZD7288, an HCN channel blocker, to stage 3 RO cones. (E, F) Individual exemplar light responses of stage 3 RO cones before (black) and after (red) blocking HCN channels.

**Table S1: Human pluripotent stem cell lines, related to all figures**

| line | hPSC | gender | rods | cones | % rods | % cones | reference               | # of organoids |
|------|------|--------|------|-------|--------|---------|-------------------------|----------------|
| 1013 | iPSC | Male   | 1485 | 518   | 74.1   | 25.8    | (Capowski et al., 2019) | 3              |
| 1581 | iPSC | Male   | 1762 | 426   | 80.5   | 19.4    | (Kallman et al., 2020)  | 2              |
| WA09 | hESC | Female | 1045 | 251   | 80.6   | 19.4    | (Capowski et al., 2019) | 14             |
| 2429 | iPSC | Male   | 933  | 246   | 79.1   | 20.9    |                         | 4              |

**Table S2: Quantification of parameters for light responses in Fig 1 and 2.**

| Parameter                         | Organoid cone |           |    | Primate foveal cone |          |    |
|-----------------------------------|---------------|-----------|----|---------------------|----------|----|
|                                   | Mean          | SEM       | n  | Mean                | SEM      | n  |
| Typing flash – peak amplitude     | 2.512 mV      | 0.448 mV  | 27 | 9.372 mV            | 0.562 mV | 14 |
| Typing flash – time to peak       | 127.567 ms    | 9.689 ms  | 27 | 62.193 ms           | 2.773 ms | 14 |
| 5000 R* background – time to peak | 203.753 ms    | 21.148 ms | 15 | 34.796 ms           | 1.728 ms | 7  |
| 5000 R* background – decay time   | 88.530 ms     | 8.401 ms  | 15 | 20.666 ms           | 1.035 ms | 7  |
| 5000 R* background – FWHM         | 229.505 ms    | 20.481 ms | 15 | 47.689 ms           | 1.775 ms | 7  |

**Table S3: Quantification of passive membrane properties in Fig 3.**

| Parameter                  | Organoid cone |          |    | Primate foveal cone |          |   |
|----------------------------|---------------|----------|----|---------------------|----------|---|
|                            | Mean          | SEM      | n  | Mean                | SEM      | n |
| Resting membrane potential | -34 mV        | 2.809 mV | 19 | -51.5 mV            | 2.703 mV | 9 |
| Membrane time constant     | 1.615 ms      | 0.097 ms | 14 | 1.051 ms            | 0.091 ms | 8 |
| Input Resistance           | 35.1 MΩ       | 2.055 MΩ | 10 | 30.913 MΩ           | 1.990 MΩ | 8 |
| Membrane Capacitance       | 37.933 pF     | 4.572 pF | 15 | 38.129 pF           | 3.765 pF | 7 |
